# Supplementary material for: A secondary RET mutation in the activation loop conferring resistance to vandetanib
Source: PubMed Central journal article supplement (PMC5809600; doi:10.1038/s41467-018-02994-7), 2018-02-12
Supplement: 41467_2018_2994_MOESM3_ESM.pdf [file 41467_2018_2994_MOESM3_ESM.pdf]

## **Description of Additional Supplementary Files**

File Name: Supplementary Movie 1

Description: Molecular dynamics (MD) simulation of wild-type RET kinase domain (KD) in complex with vandetanib. Movie representing a 1  $\mu$ s MD simulation of the wild-type RET KD in complex with vandetanib is shown (see also Supplementary Figure 7f).

File Name: Supplementary Movie 2

Description: Molecular dynamics (MD) simulation of S904F mutant RET kinase domain (KD) in complex with vandetanib. Movie representing a 1  $\mu$ s MD simulation of the S904F mutant RET KD in complex with vandetanib is shown (see also Supplementary Figure 7f).
